# Supplementary material
Source: MDPI journal article supplement (https://www.mdpi.com/2073-4441/12/3/662)
Supplement: s1 [file s1]

## Legend

### Wells

- Lake
- River

### Hydrology

- Lake
- River

### Quaternary sediments

- Ap
- At
- Ax
- Cg
- Ed
- Go
- Gs
- Gx
- GxT
- L
- LGb
- LGd
- MGa
- MGb
- MGd
- O
- R
- Ri
- Rs
- Tc
- Tm

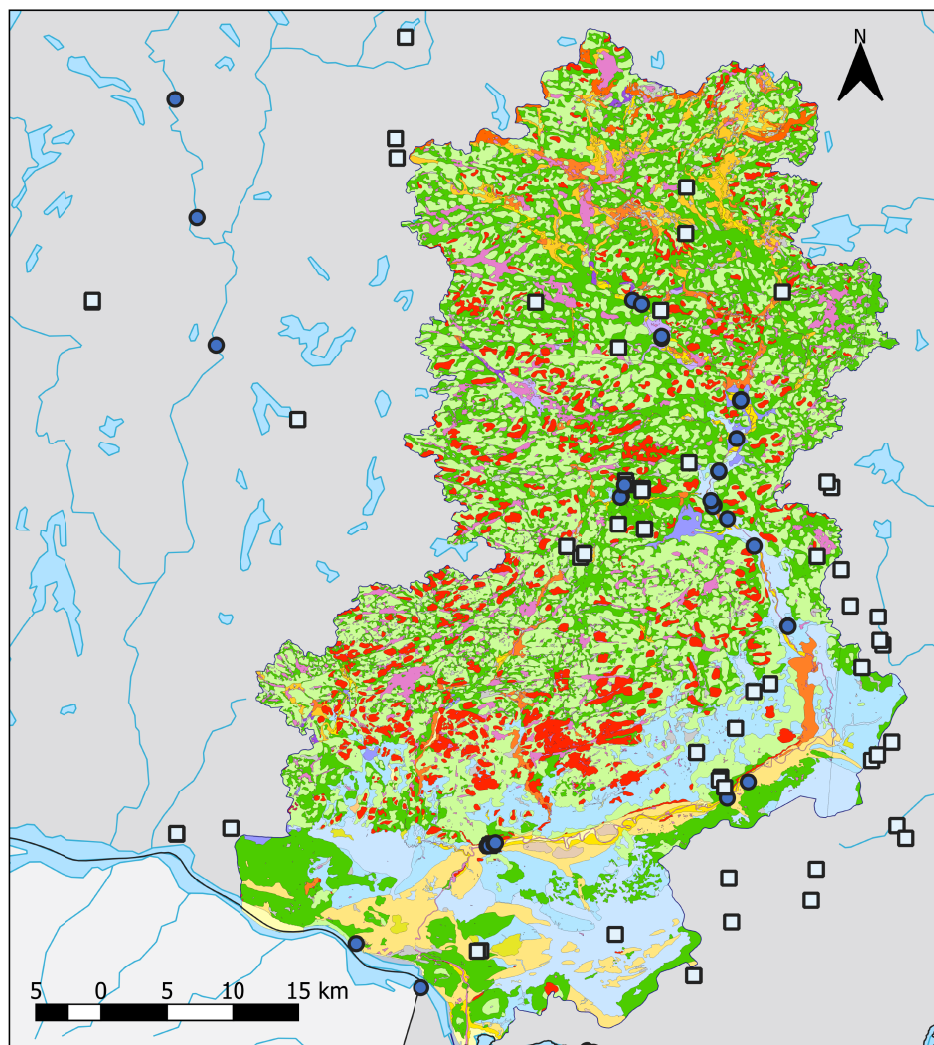

Figure S1: Map of Areas #1 (Laurentides) with quaternary geology and well distribution

## Legend

### Wells

- Lake
- River

### Hydrology

- Lake
- River

### Quaternary sediments

- Ap
- At
- Ax
- Cg
- Ed
- Gs
- Gx
- L
- Lb
- Ld
- LGb
- LGd
- MGa
- MGb
- MGd
- O
- R
- T
- Tc
- Tm
- Tr
- Trm
- Q

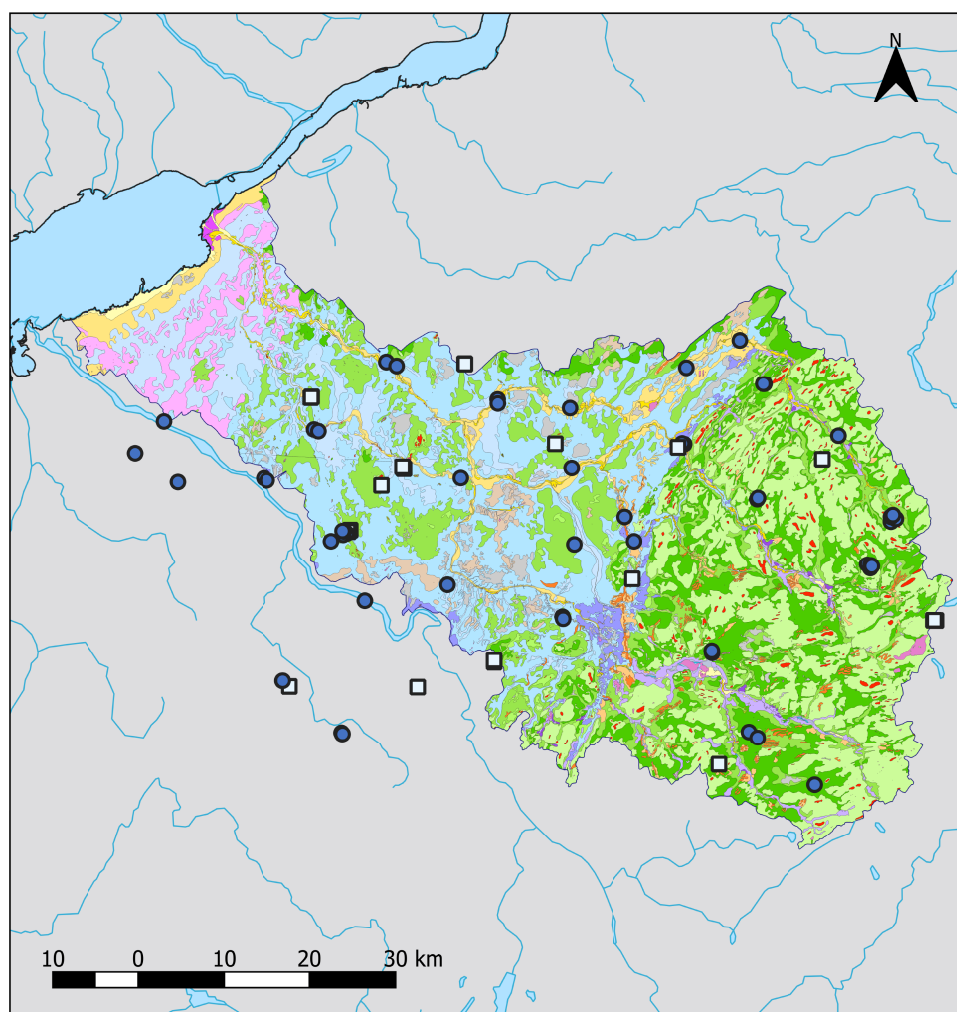

Figure S2: Map of Areas #2 (Nicolet) with quaternary geology and well distribution,

## Legend

### Wells

- Lake
- River

### Hydrology

- Lake
- River

### Quaternary sediments

- Ap
- At
- Ax
- Cg
- Ed
- Gs
- Gx
- L
- Ld
- MGa
- MGb
- MGd
- O
- R
- Ri
- Rs
- Tc
- Tm
- Tr
- Trm

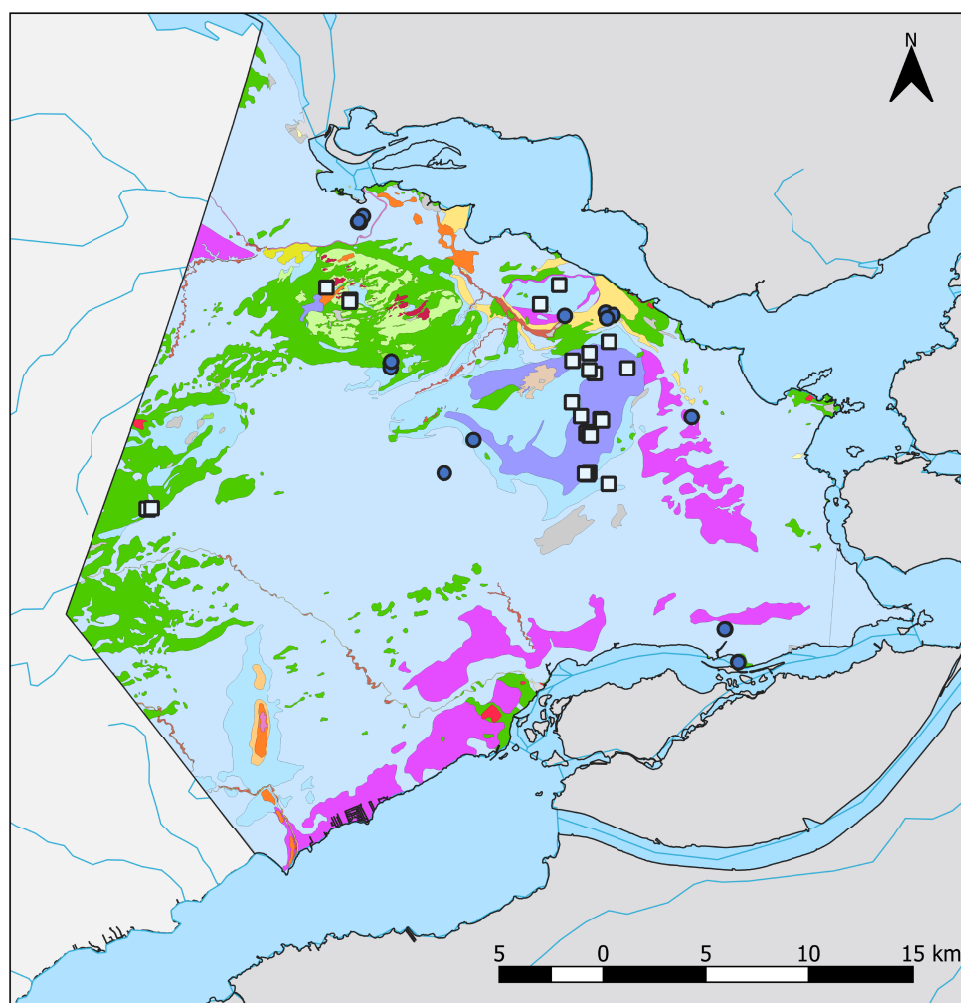

Figure S3: Map of Areas #3 (Vaudreuil Soulanges) with quaternary geology and well distribution

Table S1: Legend for the quaternary geology units in Figure S1, S2, S3.

| CODE_DEPOT | DESCRIPTION                                         |
|------------|-----------------------------------------------------|
| A          | Undifferentiated alluvium                           |
| Trm        | Alluvial fan                                        |
| Ae         | Old estuarine sediment                              |
| Ap         | Active alluvium                                     |
| At         | River terrace's alluvium                            |
| Ax         | Old river terrace's alluvium                        |
| C          | Undifferentiated colluvium deposit                  |
| Ca         | Avalanche deposit                                   |
| Ce         | Scree deposit                                       |
| Cg         | Landslide deposit                                   |
| Cl         | Stratified scree                                    |
| Cr         | Rocky glacier deposit                               |
| Ed         | Eolian sediment                                     |
| El         | Loess                                               |
| G          | Undifferentiated proglacial sediment                |
| Go         | Sediment of subaerial proglacial spreading          |
| Gs         | Sediment of underwater proglacial spreading         |
| Gx         | Ice-contact sediment                                |
| GxT        | Sediment of the frontal moraine                     |
| Gxi        | Interlobate ice-contact sediment                    |
| L          | Undifferentiated lacustrine sediment                |
| LG         | Undifferentiated glaciolacustrine sediment          |
| LGa        | Deep-water fine glaciolacustrine sediment           |
| LGb        | Coastal and pre-littoral glaciolacustrine sediment  |
| LGd        | Deltaic / prodeltaic glaciolacustrine sediment      |
| La         | Deep-water fine lacustrine sediment                 |
| Lb         | Coastal and pre-littoral lacustrine sediment        |
| Ld         | Deltaic / prodeltaic lacustrine sediment            |
| M          | Undifferentiated marine sediment                    |
| MG         | Undifferentiated glaciomarine sediment              |
| MGa        | Deep-water fine glaciomarine sediment               |
| MGb        | Coastal and pre-littoral glaciomarine sediment      |
| MGd        | Deltaic / prodeltaic glaciomarine sediment          |
| MGi        | Intertidal glaciomarine sediment                    |
| Ma         | Deep-water fine marine sediment                     |
| Mb         | Coastal and pre-littoral marine sediment            |
| Md         | Deltaic / prodeltaic marine sediment                |
| Mi         | Intertidal marine sediment                          |
| O          | Undifferentiated organic sediment                   |
| Om         | Swampland and swamp sediment                        |
| Ot         | Peatland sediment                                   |
| Q          | Undifferentiated ancient quaternary formation       |
| Qa         | Altered ancient quaternary formation                |
| Qf         | Felsenmeer (blockfield)                             |
| R          | Undifferentiated rock in place                      |
| Rd         | Deformed metasedimentary and / or metavolcanic rock |
| Ri         | Intrusive igneous rock                              |

|    |                                       |
|----|---------------------------------------|
| Rm | High grade metamorphic rock           |
| Rs | Sedimentary and / or volcanic rocks   |
| T  | Undifferentiated till                 |
| Tc | Till on a generally continuous cover  |
| Tf | Melt-out or ablation till             |
| Tm | Till in thin, discontinuous cover     |
| Tr | Till remodeled in continuous cover    |
| Ac | Till remodeled in discontinuous cover |
